# Supplementary material for: Synthesis and preliminary DNA-binding studies of diimineplatinum(ii) complexes containing 3- or 4-pyridineboronic acid
Source: Royal Society of Chemistry journal article supplement (doi:10.1039/b618668h), 2007-01-01
Supplement: b618668h.pdf [file b618668h.pdf]

**Supplementary Information**

**Synthesis and Preliminary DNA-Binding Studies of Diimineplatinum(II)  
Complexes Containing 3- or 4-Pyridineboronic Acid**

H. Y. Vincent Ching,<sup>a</sup> Jack K. Clegg,<sup>b</sup> and Louis M. Rendina<sup>a\*</sup>

<sup>a</sup> *School of Chemistry, The University of Sydney, Sydney, NSW 2006, Australia.*

<sup>b</sup> *Crystal Structure Analysis Facility, School of Chemistry, The University of Sydney,  
Sydney, NSW 2006, Australia.*

### **X-ray Diffraction Study: Analysis of Crystal Packing**

The  $[\text{Pt}(\text{phen})(\text{py})_2]^{2+}$  cations in **7** pack closely together in the structure, forming an infinite three-dimensional network of  $\pi$ - $\pi$  stacking interactions. These interactions are shown in Figures S1 and S2. Figure S1 shows a view down the crystallographic *a*-axis of a portion of the crystal packing. Each of the phen ligands is sandwiched between two adjacent molecules and participates in offset face-to-face  $\pi$ - $\pi$  stacking reflected in C–C distances ranging from 3.3 Å to 3.7 Å, forming infinite one-dimensional chains. Each of these chains interacts with adjacent chains *via* edge-to-face  $\pi$ - $\pi$  stacking. These are reflected in CH–C distances ranging from 2.9 Å to 3.6 Å. These interactions are present between pyridine rings and phen ligands in a herring-bone type of arrangement to form an infinite 3D network.

Figure S2 depicts a “top view” of the one-dimensional chains described above. The chains depicted in blue are rotated by approximately 60° from the green chains resulting in the herring-bone type arrangement. Each of the green chains interacts with adjacent green and blue chains *via*  $\pi$ - $\pi$  stacking. Each blue chain similarly interacts with each adjacent green and blue chain. Voids throughout the lattice are filled with the  $\text{PF}_6^-$  anions.

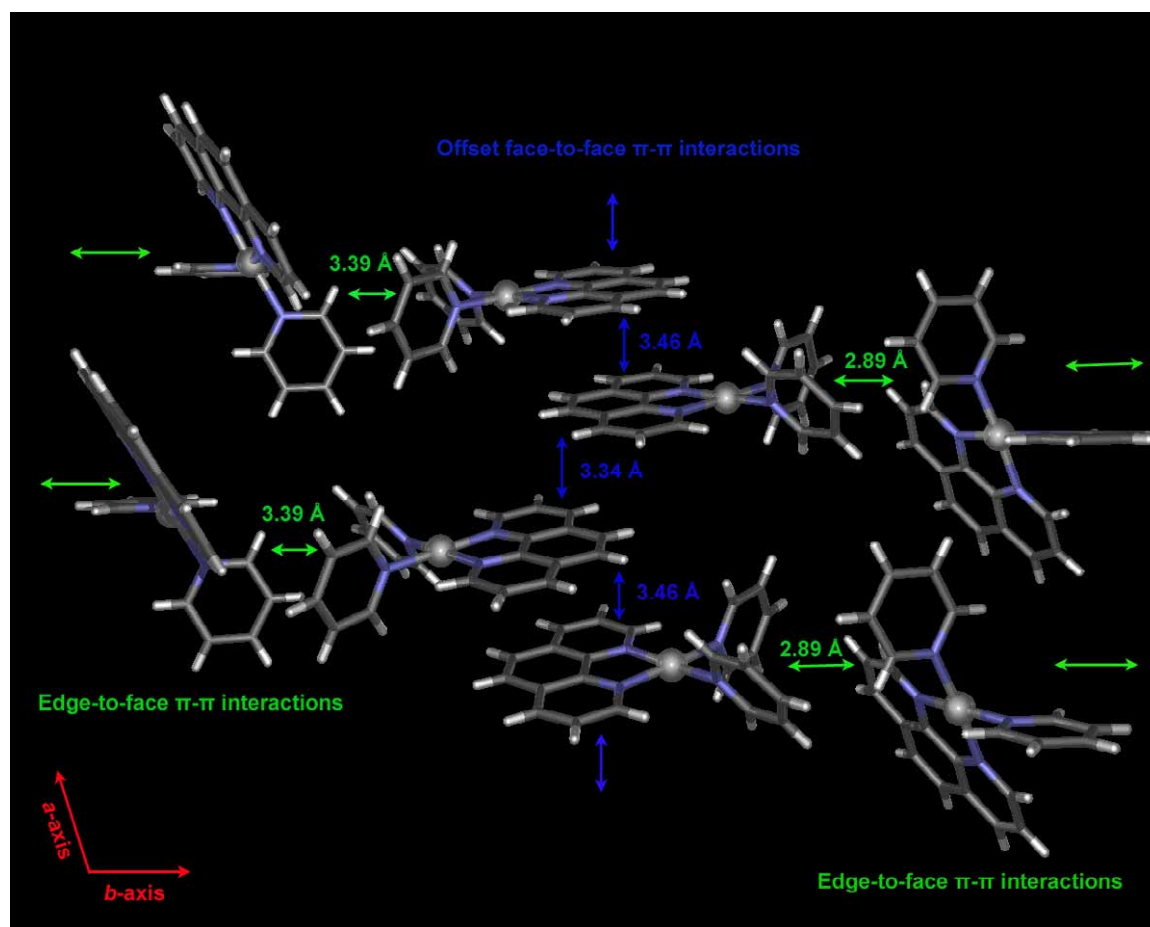

**Figure S1.** A schematic diagram of part of the crystal packing of [Pt(phen)(py)<sub>2</sub>](PF<sub>6</sub>)<sub>2</sub>. Anions are omitted for clarity.

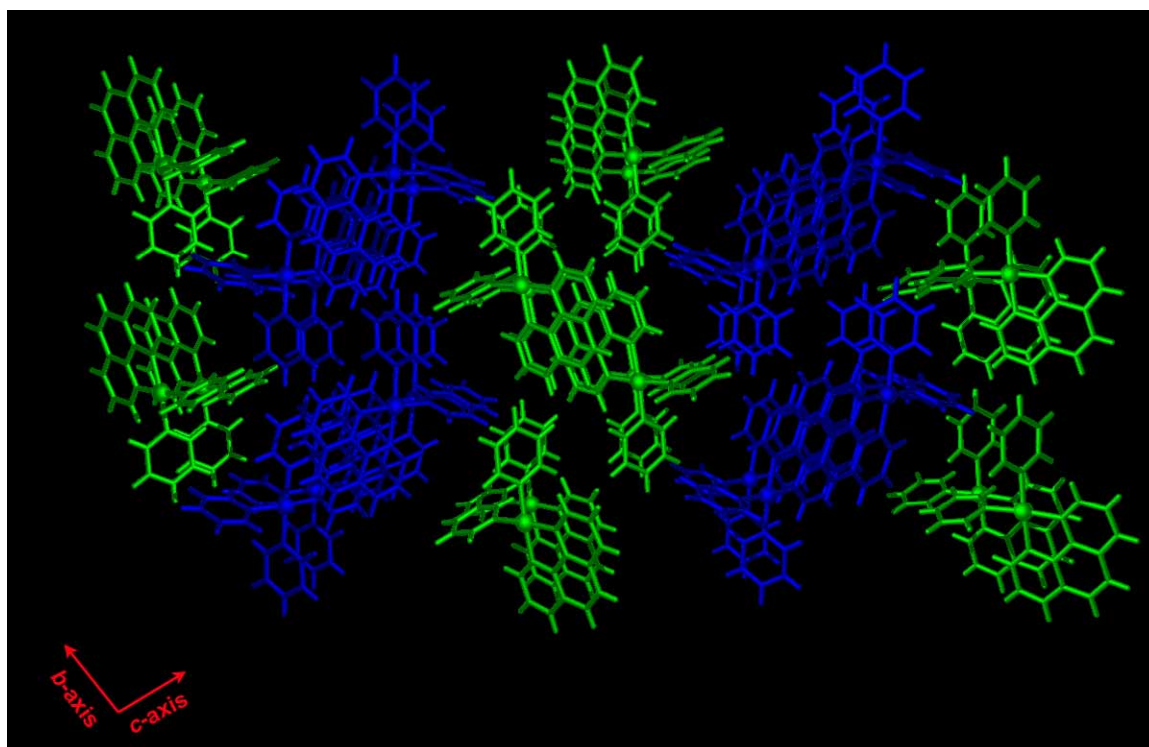

**Figure S2.** A representation of the crystal packing viewed down the crystallographic  $a$ -axis. Those molecules shown in blue are rotated by approximately  $60^\circ$  compared to those in green. Anions are omitted for clarity.

**Table 1.** Non-Hydrogen Atom Coordinates, Isotropic Thermal Parameters and Occupancies

| atom  | x           | y            | z           | $U_{eq}$ (Å <sup>2</sup> ) | Occ |
|-------|-------------|--------------|-------------|----------------------------|-----|
| C(1)  | 0.1324(13)  | 0.4671(5)    | 0.2325(9)   | 0.030(3)                   | 1   |
| C(2)  | 0.0550(12)  | 0.5115(5)    | 0.2589(10)  | 0.030(3)                   | 1   |
| C(3)  | 0.0843(14)  | 0.5324(5)    | 0.3667(11)  | 0.036(3)                   | 1   |
| C(4)  | 0.1922(13)  | 0.5084(4)    | 0.4489(10)  | 0.029(3)                   | 1   |
| C(5)  | 0.2672(12)  | 0.4636(4)    | 0.4145(9)   | 0.024(2)                   | 1   |
| C(6)  | 0.2342(14)  | 0.5268(5)    | 0.5639(11)  | 0.037(3)                   | 1   |
| C(7)  | 0.3402(14)  | 0.5009(6)    | 0.6388(10)  | 0.038(3)                   | 1   |
| C(8)  | 0.4144(13)  | 0.4553(5)    | 0.6053(10)  | 0.031(3)                   | 1   |
| C(9)  | 0.5245(14)  | 0.4265(6)    | 0.6784(10)  | 0.037(3)                   | 1   |
| C(10) | 0.5899(15)  | 0.3835(6)    | 0.6372(11)  | 0.043(3)                   | 1   |
| C(11) | 0.5432(14)  | 0.3676(5)    | 0.5242(10)  | 0.035(3)                   | 1   |
| C(12) | 0.3740(12)  | 0.4367(4)    | 0.4934(9)   | 0.023(2)                   | 1   |
| C(13) | 0.2201(15)  | 0.3319(5)    | 0.0707(12)  | 0.040(3)                   | 1   |
| C(14) | 0.1726(17)  | 0.3290(6)    | -0.0464(13) | 0.048(4)                   | 1   |
| C(15) | 0.2011(15)  | 0.3681(6)    | -0.1155(12) | 0.045(4)                   | 1   |
| C(16) | 0.2772(14)  | 0.4116(6)    | -0.0698(10) | 0.037(3)                   | 1   |
| C(17) | 0.3234(13)  | 0.4126(5)    | 0.0466(10)  | 0.031(3)                   | 1   |
| C(18) | 0.4569(17)  | 0.2719(5)    | 0.3294(13)  | 0.045(3)                   | 1   |
| C(19) | 0.555(2)    | 0.2298(6)    | 0.3421(16)  | 0.061(5)                   | 1   |
| C(20) | 0.6957(18)  | 0.2332(6)    | 0.3042(13)  | 0.051(4)                   | 1   |
| C(21) | 0.7394(17)  | 0.2770(6)    | 0.2509(13)  | 0.051(4)                   | 1   |
| C(22) | 0.6396(14)  | 0.3187(5)    | 0.2423(10)  | 0.034(3)                   | 1   |
| N(1)  | 0.2371(10)  | 0.4439(3)    | 0.3065(7)   | 0.0219(19)                 | 1   |
| N(2)  | 0.4407(10)  | 0.3936(3)    | 0.4543(7)   | 0.023(2)                   | 1   |
| N(3)  | 0.2952(10)  | 0.3732(3)    | 0.1162(7)   | 0.025(2)                   | 1   |
| N(4)  | 0.4991(10)  | 0.3159(4)    | 0.2806(8)   | 0.027(2)                   | 1   |
| F(1)  | 0.8121(9)   | 0.4007(4)    | -0.1118(6)  | 0.053(2)                   | 1   |
| F(2)  | 0.7075(10)  | 0.4385(3)    | 0.1252(6)   | 0.052(2)                   | 1   |
| F(3)  | 0.6354(9)   | 0.4581(3)    | -0.0607(6)  | 0.0440(19)                 | 1   |
| F(4)  | 0.8886(10)  | 0.4645(4)    | 0.0135(7)   | 0.060(2)                   | 1   |
| F(5)  | 0.6350(9)   | 0.3752(3)    | -0.0008(7)  | 0.0478(19)                 | 1   |
| F(6)  | 0.8857(9)   | 0.3825(3)    | 0.0772(6)   | 0.049(2)                   | 1   |
| F(7)  | 0.1436(11)  | 0.1317(4)    | 0.0794(11)  | 0.088(4)                   | 1   |
| F(8)  | -0.0540(13) | 0.1645(4)    | 0.1502(10)  | 0.087(4)                   | 1   |
| F(9)  | -0.0586(14) | 0.2313(4)    | 0.0230(10)  | 0.093(4)                   | 1   |
| F(10) | 0.1334(19)  | 0.1973(5)    | -0.0495(14) | 0.141(7)                   | 1   |
| F(11) | -0.079(2)   | 0.1503(6)    | -0.0318(11) | 0.138(6)                   | 1   |
| F(12) | 0.1479(18)  | 0.2126(5)    | 0.1396(13)  | 0.134(6)                   | 1   |
| P(1)  | 0.7619(4)   | 0.41978(13)  | 0.0069(3)   | 0.0303(7)                  | 1   |
| P(2)  | 0.0418(4)   | 0.18181(14)  | 0.0493(3)   | 0.0414(8)                  | 1   |
| Pt(1) | 0.36678(5)  | 0.380170(17) | 0.28666(4)  | 0.02618(13)                | 1   |

**Table 2.** Hydrogen Atom Coordinates, Isotropic Thermal Parameters and Occupancies

| atom  | x       | y      | z       | $U_{eq}(\text{Å}^2)$ | Occ |
|-------|---------|--------|---------|----------------------|-----|
| H(1)  | 0.1091  | 0.4527 | 0.1578  | 0.036                | 1   |
| H(2)  | -0.0183 | 0.5274 | 0.2024  | 0.037                | 1   |
| H(3)  | 0.0318  | 0.5629 | 0.3854  | 0.043                | 1   |
| H(6)  | 0.1875  | 0.5575 | 0.5880  | 0.045                | 1   |
| H(7)  | 0.3651  | 0.5135 | 0.7149  | 0.045                | 1   |
| H(9)  | 0.5530  | 0.4370 | 0.7557  | 0.044                | 1   |
| H(10) | 0.6666  | 0.3644 | 0.6850  | 0.051                | 1   |
| H(11) | 0.5871  | 0.3370 | 0.4971  | 0.043                | 1   |
| H(13) | 0.1986  | 0.3040 | 0.1189  | 0.048                | 1   |
| H(14) | 0.1195  | 0.2992 | -0.0778 | 0.058                | 1   |
| H(15) | 0.1689  | 0.3659 | -0.1957 | 0.054                | 1   |
| H(16) | 0.2972  | 0.4399 | -0.1172 | 0.045                | 1   |
| H(17) | 0.3771  | 0.4422 | 0.0793  | 0.037                | 1   |
| H(18) | 0.3572  | 0.2699 | 0.3555  | 0.054                | 1   |
| H(19) | 0.5239  | 0.1989 | 0.3769  | 0.074                | 1   |
| H(20) | 0.7658  | 0.2048 | 0.3145  | 0.061                | 1   |
| H(21) | 0.8364  | 0.2786 | 0.2207  | 0.061                | 1   |
| H(22) | 0.6702  | 0.3498 | 0.2087  | 0.041                | 1   |

**Table 3.** Anisotropic Thermal Parameters ( $\text{\AA}^2$ )

| atom  | U(1,1)     | U(2,2)     | U(3,3)     | U(1,2)      | U(1,3)      | U(2,3)     |
|-------|------------|------------|------------|-------------|-------------|------------|
| C(1)  | 0.025(5)   | 0.039(7)   | 0.024(6)   | 0.004(5)    | -0.001(5)   | 0.000(5)   |
| C(2)  | 0.016(5)   | 0.045(8)   | 0.031(6)   | 0.007(5)    | 0.008(4)    | 0.006(5)   |
| C(3)  | 0.029(6)   | 0.027(7)   | 0.053(8)   | 0.003(5)    | 0.017(6)    | 0.004(6)   |
| C(4)  | 0.027(6)   | 0.025(6)   | 0.036(6)   | -0.005(5)   | 0.016(5)    | -0.001(5)  |
| C(5)  | 0.018(5)   | 0.029(6)   | 0.027(5)   | -0.007(4)   | 0.007(4)    | 0.002(5)   |
| C(6)  | 0.028(6)   | 0.044(8)   | 0.044(7)   | -0.010(6)   | 0.017(5)    | -0.015(6)  |
| C(7)  | 0.034(7)   | 0.061(9)   | 0.022(6)   | -0.017(6)   | 0.016(5)    | -0.013(6)  |
| C(8)  | 0.024(6)   | 0.044(8)   | 0.026(6)   | -0.010(5)   | 0.010(5)    | 0.000(5)   |
| C(9)  | 0.025(6)   | 0.064(9)   | 0.020(5)   | -0.016(6)   | -0.004(4)   | 0.004(6)   |
| C(10) | 0.033(6)   | 0.056(9)   | 0.038(7)   | -0.007(7)   | -0.001(5)   | 0.013(7)   |
| C(11) | 0.032(6)   | 0.042(8)   | 0.033(6)   | 0.002(5)    | 0.007(5)    | 0.011(5)   |
| C(12) | 0.016(5)   | 0.032(6)   | 0.022(5)   | -0.007(4)   | 0.009(4)    | -0.001(4)  |
| C(13) | 0.036(7)   | 0.032(7)   | 0.052(8)   | 0.002(6)    | -0.001(6)   | -0.011(6)  |
| C(14) | 0.043(8)   | 0.042(8)   | 0.056(9)   | 0.001(6)    | -0.013(7)   | -0.018(7)  |
| C(15) | 0.029(7)   | 0.064(11)  | 0.039(7)   | 0.015(6)    | -0.008(5)   | -0.011(7)  |
| C(16) | 0.024(6)   | 0.059(9)   | 0.028(6)   | 0.010(6)    | 0.003(5)    | 0.006(6)   |
| C(17) | 0.024(6)   | 0.034(7)   | 0.034(6)   | 0.003(5)    | 0.004(5)    | -0.002(5)  |
| C(18) | 0.043(8)   | 0.024(7)   | 0.070(10)  | 0.002(6)    | 0.010(7)    | 0.009(7)   |
| C(19) | 0.068(11)  | 0.028(8)   | 0.086(13)  | 0.003(7)    | 0.002(9)    | 0.013(8)   |
| C(20) | 0.049(9)   | 0.034(8)   | 0.066(10)  | 0.017(7)    | -0.007(7)   | -0.008(7)  |
| C(21) | 0.038(8)   | 0.056(10)  | 0.060(10)  | 0.002(7)    | 0.013(7)    | -0.011(8)  |
| C(22) | 0.038(7)   | 0.036(7)   | 0.031(6)   | 0.007(6)    | 0.013(5)    | 0.003(5)   |
| N(1)  | 0.016(4)   | 0.026(5)   | 0.024(4)   | -0.002(4)   | 0.004(3)    | -0.008(4)  |
| N(2)  | 0.019(4)   | 0.028(5)   | 0.023(4)   | 0.004(4)    | 0.005(3)    | 0.006(4)   |
| N(3)  | 0.029(5)   | 0.020(5)   | 0.025(4)   | 0.006(4)    | -0.001(4)   | -0.003(4)  |
| N(4)  | 0.020(5)   | 0.029(5)   | 0.033(5)   | 0.005(4)    | 0.005(4)    | -0.007(4)  |
| F(1)  | 0.045(5)   | 0.081(6)   | 0.036(4)   | 0.006(4)    | 0.012(3)    | 0.001(4)   |
| F(2)  | 0.070(6)   | 0.058(5)   | 0.029(4)   | -0.001(4)   | 0.008(4)    | -0.012(4)  |
| F(3)  | 0.044(4)   | 0.042(5)   | 0.042(4)   | 0.005(4)    | -0.010(3)   | -0.003(3)  |
| F(4)  | 0.051(5)   | 0.073(6)   | 0.052(5)   | -0.037(5)   | -0.009(4)   | 0.009(4)   |
| F(5)  | 0.042(4)   | 0.041(5)   | 0.061(5)   | -0.016(4)   | 0.010(4)    | -0.007(4)  |
| F(6)  | 0.051(5)   | 0.068(6)   | 0.026(3)   | 0.015(4)    | -0.005(3)   | 0.014(4)   |
| F(7)  | 0.060(6)   | 0.058(7)   | 0.158(11)  | 0.030(5)    | 0.056(7)    | 0.031(7)   |
| F(8)  | 0.082(8)   | 0.094(8)   | 0.094(8)   | 0.024(6)    | 0.043(6)    | 0.029(7)   |
| F(9)  | 0.097(9)   | 0.077(8)   | 0.104(9)   | 0.043(7)    | 0.007(7)    | 0.025(7)   |
| F(10) | 0.191(15)  | 0.076(8)   | 0.191(15)  | 0.030(9)    | 0.161(13)   | 0.045(9)   |
| F(11) | 0.196(16)  | 0.112(11)  | 0.088(9)   | -0.073(11)  | -0.054(9)   | 0.017(8)   |
| F(12) | 0.167(14)  | 0.065(8)   | 0.145(12)  | -0.035(8)   | -0.081(11)  | 0.031(8)   |
| P(1)  | 0.0263(15) | 0.0393(18) | 0.0246(14) | -0.0059(13) | 0.0004(12)  | 0.0006(13) |
| P(2)  | 0.043(2)   | 0.036(2)   | 0.046(2)   | 0.0066(16)  | 0.0100(16)  | 0.0055(16) |
| Pt(1) | 0.0267(2)  | 0.0255(2)  | 0.0266(2)  | 0.0019(2)   | 0.00429(14) | 0.0017(2)  |

**Table 4.** Non Hydrogen Bond Lengths (Å)

| atom  | atom  | Distance  | atom  | atom  | Distance  |
|-------|-------|-----------|-------|-------|-----------|
| C(1)  | N(1)  | 1.316(14) | C(1)  | C(2)  | 1.384(16) |
| C(2)  | C(3)  | 1.371(17) | C(3)  | C(4)  | 1.400(17) |
| C(4)  | C(5)  | 1.411(16) | C(4)  | C(6)  | 1.435(17) |
| C(5)  | N(1)  | 1.361(13) | C(5)  | C(12) | 1.406(15) |
| C(6)  | C(7)  | 1.363(19) | C(7)  | C(8)  | 1.423(18) |
| C(8)  | C(12) | 1.402(15) | C(8)  | C(9)  | 1.410(17) |
| C(9)  | C(10) | 1.37(2)   | C(10) | C(11) | 1.399(18) |
| C(11) | N(2)  | 1.314(14) | C(12) | N(2)  | 1.360(14) |
| C(13) | N(3)  | 1.327(15) | C(13) | C(14) | 1.386(19) |
| C(14) | C(15) | 1.34(2)   | C(15) | C(16) | 1.378(19) |
| C(16) | C(17) | 1.376(16) | C(17) | N(3)  | 1.349(15) |
| C(18) | N(4)  | 1.346(16) | C(18) | C(19) | 1.376(19) |
| C(19) | C(20) | 1.35(2)   | C(20) | C(21) | 1.37(2)   |
| C(21) | C(22) | 1.375(19) | C(22) | N(4)  | 1.345(14) |
| N(1)  | Pt(1) | 2.024(9)  | N(2)  | Pt(1) | 2.022(9)  |
| N(3)  | Pt(1) | 2.027(9)  | N(4)  | Pt(1) | 2.025(9)  |
| F(1)  | P(1)  | 1.590(8)  | F(2)  | P(1)  | 1.596(8)  |
| F(3)  | P(1)  | 1.608(8)  | F(4)  | P(1)  | 1.588(8)  |
| F(5)  | P(1)  | 1.586(8)  | F(6)  | P(1)  | 1.590(8)  |
| F(7)  | P(2)  | 1.582(9)  | F(8)  | P(2)  | 1.592(10) |
| F(9)  | P(2)  | 1.557(10) | F(10) | P(2)  | 1.537(10) |
| F(11) | P(2)  | 1.554(12) | F(12) | P(2)  | 1.534(12) |

Symmetry Operators

|                      |             |                       |     |
|----------------------|-------------|-----------------------|-----|
| □                    | (1) x, y, z | (2) -x, y+1/2, -z+1/2 | (3) |
| -x, -y, -z           |             |                       |     |
| (4) x, -y-1/2, z-1/2 |             |                       |     |



**Table 5.** Non Hydrogen Bond Angles (°)

| atom  | atom  | atom  | angle     |
|-------|-------|-------|-----------|
| N(1)  | C(1)  | C(2)  | 122.7(10) |
| C(3)  | C(2)  | C(1)  | 119.8(11) |
| C(2)  | C(3)  | C(4)  | 119.3(11) |
| C(3)  | C(4)  | C(5)  | 117.2(11) |
| C(3)  | C(4)  | C(6)  | 124.6(11) |
| C(5)  | C(4)  | C(6)  | 118.2(11) |
| N(1)  | C(5)  | C(12) | 117.4(10) |
| N(1)  | C(5)  | C(4)  | 122.3(10) |
| C(12) | C(5)  | C(4)  | 120.3(10) |
| C(7)  | C(6)  | C(4)  | 120.8(12) |
| C(6)  | C(7)  | C(8)  | 121.2(11) |
| C(12) | C(8)  | C(9)  | 117.3(12) |
| C(12) | C(8)  | C(7)  | 118.6(11) |
| C(9)  | C(8)  | C(7)  | 124.2(11) |
| C(10) | C(9)  | C(8)  | 119.5(11) |
| C(9)  | C(10) | C(11) | 119.6(12) |
| N(2)  | C(11) | C(10) | 122.1(12) |
| N(2)  | C(12) | C(5)  | 117.0(9)  |
| N(2)  | C(12) | C(8)  | 122.1(10) |
| C(5)  | C(12) | C(8)  | 120.8(11) |
| N(3)  | C(13) | C(14) | 120.7(13) |
| C(15) | C(14) | C(13) | 120.5(13) |
| C(14) | C(15) | C(16) | 119.8(13) |
| C(17) | C(16) | C(15) | 117.8(13) |
| N(3)  | C(17) | C(16) | 122.4(12) |
| N(4)  | C(18) | C(19) | 121.5(13) |
| C(20) | C(19) | C(18) | 118.5(14) |
| C(19) | C(20) | C(21) | 121.1(14) |
| C(22) | C(21) | C(20) | 118.5(13) |
| N(4)  | C(22) | C(21) | 121.0(12) |
| C(1)  | N(1)  | C(5)  | 118.6(9)  |
| C(1)  | N(1)  | Pt(1) | 129.7(7)  |
| C(5)  | N(1)  | Pt(1) | 111.7(7)  |
| C(11) | N(2)  | C(12) | 119.3(10) |
| C(11) | N(2)  | Pt(1) | 128.6(8)  |
| C(12) | N(2)  | Pt(1) | 112.0(7)  |
| C(13) | N(3)  | C(17) | 118.9(10) |
| C(13) | N(3)  | Pt(1) | 122.8(9)  |
| C(17) | N(3)  | Pt(1) | 118.3(8)  |
| C(18) | N(4)  | C(22) | 119.4(11) |
| C(18) | N(4)  | Pt(1) | 119.8(8)  |
| C(22) | N(4)  | Pt(1) | 120.2(8)  |
| F(5)  | P(1)  | F(4)  | 179.5(5)  |
| F(5)  | P(1)  | F(1)  | 89.2(5)   |
| F(4)  | P(1)  | F(1)  | 90.5(5)   |
| F(5)  | P(1)  | F(2)  | 89.7(4)   |
| F(4)  | P(1)  | F(2)  | 90.6(5)   |

|       |       |       |           |
|-------|-------|-------|-----------|
| F(1)  | P(1)  | F(2)  | 178.7(5)  |
| F(5)  | P(1)  | F(6)  | 90.0(5)   |
| F(4)  | P(1)  | F(6)  | 90.3(5)   |
| F(1)  | P(1)  | F(6)  | 91.6(4)   |
| F(2)  | P(1)  | F(6)  | 89.1(4)   |
| F(5)  | P(1)  | F(3)  | 90.1(4)   |
| F(4)  | P(1)  | F(3)  | 89.6(5)   |
| F(1)  | P(1)  | F(3)  | 90.1(4)   |
| F(2)  | P(1)  | F(3)  | 89.2(4)   |
| F(6)  | P(1)  | F(3)  | 178.3(5)  |
| F(12) | P(2)  | F(10) | 93.9(10)  |
| F(12) | P(2)  | F(11) | 173.3(10) |
| F(10) | P(2)  | F(11) | 92.5(9)   |
| F(12) | P(2)  | F(9)  | 88.6(7)   |
| F(10) | P(2)  | F(9)  | 87.8(7)   |
| F(11) | P(2)  | F(9)  | 89.8(8)   |
| F(12) | P(2)  | F(7)  | 90.4(7)   |
| F(10) | P(2)  | F(7)  | 93.4(6)   |
| F(11) | P(2)  | F(7)  | 91.0(8)   |
| F(9)  | P(2)  | F(7)  | 178.6(7)  |
| F(12) | P(2)  | F(8)  | 87.3(8)   |
| F(10) | P(2)  | F(8)  | 178.6(8)  |
| F(11) | P(2)  | F(8)  | 86.3(8)   |
| F(9)  | P(2)  | F(8)  | 93.0(6)   |
| F(7)  | P(2)  | F(8)  | 85.8(6)   |
| N(3)  | Pt(1) | N(2)  | 175.1(4)  |
| N(3)  | Pt(1) | N(4)  | 89.7(4)   |
| N(2)  | Pt(1) | N(4)  | 93.8(4)   |
| N(3)  | Pt(1) | N(1)  | 94.8(3)   |
| N(2)  | Pt(1) | N(1)  | 81.8(3)   |
| N(4)  | Pt(1) | N(1)  | 175.4(4)  |

Symmetry Operators

|                      |             |                       |     |
|----------------------|-------------|-----------------------|-----|
| □                    | (1) x, y, z | (2) -x, y+1/2, -z+1/2 | (3) |
| -x, -y, -z           |             |                       |     |
| (4) x, -y-1/2, z-1/2 |             |                       |     |

**Table 6.** Torsion Angles (°)

| atom  | atom  | atom  | atom  | angle      |
|-------|-------|-------|-------|------------|
| N(1)  | C(1)  | C(2)  | C(3)  | -1.3(18)   |
| C(1)  | C(2)  | C(3)  | C(4)  | -0.2(17)   |
| C(2)  | C(3)  | C(4)  | C(5)  | 0.9(16)    |
| C(2)  | C(3)  | C(4)  | C(6)  | 179.2(11)  |
| C(3)  | C(4)  | C(5)  | N(1)  | -0.2(16)   |
| C(6)  | C(4)  | C(5)  | N(1)  | -178.7(10) |
| C(3)  | C(4)  | C(5)  | C(12) | -178.3(10) |
| C(6)  | C(4)  | C(5)  | C(12) | 3.2(15)    |
| C(3)  | C(4)  | C(6)  | C(7)  | 179.7(11)  |
| C(5)  | C(4)  | C(6)  | C(7)  | -1.9(17)   |
| C(4)  | C(6)  | C(7)  | C(8)  | 0.9(18)    |
| C(6)  | C(7)  | C(8)  | C(12) | -1.2(17)   |
| C(6)  | C(7)  | C(8)  | C(9)  | -179.8(11) |
| C(12) | C(8)  | C(9)  | C(10) | 2.0(17)    |
| C(7)  | C(8)  | C(9)  | C(10) | -179.4(11) |
| C(8)  | C(9)  | C(10) | C(11) | -1.9(18)   |
| C(9)  | C(10) | C(11) | N(2)  | 1.9(19)    |
| N(1)  | C(5)  | C(12) | N(2)  | 1.3(14)    |
| C(4)  | C(5)  | C(12) | N(2)  | 179.4(9)   |
| N(1)  | C(5)  | C(12) | C(8)  | 178.3(9)   |
| C(4)  | C(5)  | C(12) | C(8)  | -3.6(15)   |
| C(9)  | C(8)  | C(12) | N(2)  | -2.0(15)   |
| C(7)  | C(8)  | C(12) | N(2)  | 179.3(10)  |
| C(9)  | C(8)  | C(12) | C(5)  | -178.8(10) |
| C(7)  | C(8)  | C(12) | C(5)  | 2.4(15)    |
| N(3)  | C(13) | C(14) | C(15) | 0(2)       |
| C(13) | C(14) | C(15) | C(16) | 0(2)       |
| C(14) | C(15) | C(16) | C(17) | 0.9(19)    |
| C(15) | C(16) | C(17) | N(3)  | -0.7(17)   |
| N(4)  | C(18) | C(19) | C(20) | 0(2)       |
| C(18) | C(19) | C(20) | C(21) | -2(3)      |
| C(19) | C(20) | C(21) | C(22) | 3(2)       |
| C(20) | C(21) | C(22) | N(4)  | -3(2)      |
| C(2)  | C(1)  | N(1)  | C(5)  | 1.9(17)    |
| C(2)  | C(1)  | N(1)  | Pt(1) | -178.7(8)  |
| C(12) | C(5)  | N(1)  | C(1)  | 177.0(10)  |
| C(4)  | C(5)  | N(1)  | C(1)  | -1.1(15)   |
| C(12) | C(5)  | N(1)  | Pt(1) | -2.5(11)   |
| C(4)  | C(5)  | N(1)  | Pt(1) | 179.4(8)   |
| C(10) | C(11) | N(2)  | C(12) | -1.9(17)   |
| C(10) | C(11) | N(2)  | Pt(1) | 176.1(9)   |
| C(5)  | C(12) | N(2)  | C(11) | 178.9(10)  |
| C(8)  | C(12) | N(2)  | C(11) | 1.9(15)    |
| C(5)  | C(12) | N(2)  | Pt(1) | 0.6(11)    |
| C(8)  | C(12) | N(2)  | Pt(1) | -176.3(8)  |
| C(14) | C(13) | N(3)  | C(17) | 0.6(18)    |
| C(14) | C(13) | N(3)  | Pt(1) | 179.6(10)  |

|       |       |       |       |            |
|-------|-------|-------|-------|------------|
| C(16) | C(17) | N(3)  | C(13) | -0.1(17)   |
| C(16) | C(17) | N(3)  | Pt(1) | -179.1(9)  |
| C(19) | C(18) | N(4)  | C(22) | 1(2)       |
| C(19) | C(18) | N(4)  | Pt(1) | -170.2(12) |
| C(21) | C(22) | N(4)  | C(18) | 0.8(19)    |
| C(21) | C(22) | N(4)  | Pt(1) | 171.7(10)  |
| C(13) | N(3)  | Pt(1) | N(4)  | 59.6(9)    |
| C(17) | N(3)  | Pt(1) | N(4)  | -121.4(8)  |
| C(13) | N(3)  | Pt(1) | N(1)  | -119.3(9)  |
| C(17) | N(3)  | Pt(1) | N(1)  | 59.7(8)    |
| C(11) | N(2)  | Pt(1) | N(4)  | 1.8(10)    |
| C(12) | N(2)  | Pt(1) | N(4)  | 179.8(7)   |
| C(11) | N(2)  | Pt(1) | N(1)  | -179.6(10) |
| C(12) | N(2)  | Pt(1) | N(1)  | -1.5(7)    |
| C(18) | N(4)  | Pt(1) | N(3)  | -109.0(10) |
| C(22) | N(4)  | Pt(1) | N(3)  | 80.2(9)    |
| C(18) | N(4)  | Pt(1) | N(2)  | 74.4(10)   |
| C(22) | N(4)  | Pt(1) | N(2)  | -96.4(9)   |
| C(1)  | N(1)  | Pt(1) | N(3)  | 6.3(10)    |
| C(5)  | N(1)  | Pt(1) | N(3)  | -174.3(7)  |
| C(1)  | N(1)  | Pt(1) | N(2)  | -177.3(10) |
| C(5)  | N(1)  | Pt(1) | N(2)  | 2.1(7)     |

Symmetry Operators

|                      |             |                       |     |
|----------------------|-------------|-----------------------|-----|
| □                    | (1) x, y, z | (2) -x, y+1/2, -z+1/2 | (3) |
| -x, -y, -z           |             |                       |     |
| (4) x, -y-1/2, z-1/2 |             |                       |     |

**Table 7.** Hydrogen Bond Lengths (Å)

| atom  | atom  | Distance | atom  | atom  | Distance |
|-------|-------|----------|-------|-------|----------|
| C(1)  | H(1)  | 0.9500   | C(2)  | H(2)  | 0.9500   |
| C(3)  | H(3)  | 0.9500   | C(6)  | H(6)  | 0.9500   |
| C(7)  | H(7)  | 0.9500   | C(9)  | H(9)  | 0.9500   |
| C(10) | H(10) | 0.9500   | C(11) | H(11) | 0.9500   |
| C(13) | H(13) | 0.9500   | C(14) | H(14) | 0.9500   |
| C(15) | H(15) | 0.9500   | C(16) | H(16) | 0.9500   |
| C(17) | H(17) | 0.9500   | C(18) | H(18) | 0.9500   |
| C(19) | H(19) | 0.9500   | C(20) | H(20) | 0.9500   |
| C(21) | H(21) | 0.9500   | C(22) | H(22) | 0.9500   |

Symmetry Operators

|                      |             |                       |     |
|----------------------|-------------|-----------------------|-----|
| □                    | (1) x, y, z | (2) -x, y+1/2, -z+1/2 | (3) |
| -x, -y, -z           |             |                       |     |
| (4) x, -y-1/2, z-1/2 |             |                       |     |

**Table 8.** Hydrogen Bond Angles (°)

| atom  | atom  | atom  | angle |
|-------|-------|-------|-------|
| N(1)  | C(1)  | H(1)  | 118.6 |
| C(2)  | C(1)  | H(1)  | 118.6 |
| C(3)  | C(2)  | H(2)  | 120.1 |
| C(1)  | C(2)  | H(2)  | 120.1 |
| C(2)  | C(3)  | H(3)  | 120.4 |
| C(4)  | C(3)  | H(3)  | 120.4 |
| C(7)  | C(6)  | H(6)  | 119.6 |
| C(4)  | C(6)  | H(6)  | 119.6 |
| C(6)  | C(7)  | H(7)  | 119.4 |
| C(8)  | C(7)  | H(7)  | 119.4 |
| C(10) | C(9)  | H(9)  | 120.3 |
| C(8)  | C(9)  | H(9)  | 120.3 |
| C(9)  | C(10) | H(10) | 120.2 |
| C(11) | C(10) | H(10) | 120.2 |
| N(2)  | C(11) | H(11) | 118.9 |
| C(10) | C(11) | H(11) | 118.9 |
| N(3)  | C(13) | H(13) | 119.7 |
| C(14) | C(13) | H(13) | 119.7 |
| C(15) | C(14) | H(14) | 119.8 |
| C(13) | C(14) | H(14) | 119.8 |
| C(14) | C(15) | H(15) | 120.1 |
| C(16) | C(15) | H(15) | 120.1 |
| C(17) | C(16) | H(16) | 121.1 |
| C(15) | C(16) | H(16) | 121.1 |
| N(3)  | C(17) | H(17) | 118.8 |
| C(16) | C(17) | H(17) | 118.8 |
| N(4)  | C(18) | H(18) | 119.3 |
| C(19) | C(18) | H(18) | 119.3 |
| C(20) | C(19) | H(19) | 120.8 |
| C(18) | C(19) | H(19) | 120.8 |
| C(19) | C(20) | H(20) | 119.4 |
| C(21) | C(20) | H(20) | 119.4 |
| C(22) | C(21) | H(21) | 120.8 |
| C(20) | C(21) | H(21) | 120.8 |
| N(4)  | C(22) | H(22) | 119.5 |
| C(21) | C(22) | H(22) | 119.5 |

Symmetry Operators

|                      |             |                       |     |
|----------------------|-------------|-----------------------|-----|
| □                    | (1) x, y, z | (2) -x, y+1/2, -z+1/2 | (3) |
| -x, -y, -z           |             |                       |     |
| (4) x, -y-1/2, z-1/2 |             |                       |     |
